# Supplementary material for: The mirid bug Apolygus lucorum deploys a glutathione peroxidase as a candidate effector to enhance plant susceptibility
Source: PubMed Central journal article supplement (PMC7210764; doi:10.1093/jxb/eraa015), 2020-01-17
Supplement: eraa015_suppl_supplementary_figure_s1_table_s1.pdf [file eraa015_suppl_supplementary_figure_s1_table_s1.pdf]

**Table S1:** Summary of the qRT-PCR primers used in this study.

| Name         | Sequence (from 5' to 3')                           | Usage                                                                                |
|--------------|----------------------------------------------------|--------------------------------------------------------------------------------------|
| Pbin-AI6-F   | GACGAGCTGTACAAGGGTACCATGG<br>TCAGATCATTTCAGTTGCAGC | Expression in <i>N.benthamiana</i>                                                   |
| Pbin-AI6-R   | GCGGACTCTAGTTCATCTAGATTACT<br>GTTCCAACAGCTTTTTTA   | Expression in <i>N.benthamiana</i>                                                   |
| ALActin RT-F | TCTTGCGGTATCCACGAAAC                               | <i>Apolygus lucorum</i> beta-actin Mrna , used for real time PCR assay               |
| ALActinRT- R | GAGGGCGGTGATTTTCCTTCT                              | <i>Apolygus lucorum</i> beta-actin Mrna , used for real time PCR assay               |
| AI6-RT-F     | AGAGTGCACAGTCGGGATGGT                              | qRT-PCR primer for AI6 transcription level                                           |
| AI6-RT-R     | TGGGGTGGTTGGTGCATGTCG                              | qRT-PCR primer for AI6 transcription level                                           |
| NbEF1a-RT-F  | TATGATTACTGGTACCTCCC                               | Internal primers of <i>N. benthamiana</i> <i>EF1a</i> , used for real time PCR assay |
| NbEF1a-RT-R  | ACCTAGCCTTGAATACTTG                                | Internal primers of <i>N. benthamiana</i> <i>EF1a</i> , used for real time PCR assay |
| LOX-RT-F     | AAAACCTATGCCTCAAGAAC                               | qRT-PCR primer for JA pathway marker gene                                            |
| LOX-RT-R     | ACTGCTGCATAGGCTTTGG                                | qRT-PCR primer for JA pathway marker gene                                            |
| PDF1.2-RT-F  | CTTCAAGCAAAGCTGCAGCCAAAG                           | qRT-PCR primer for JA pathway marker gene                                            |
| PDF1.2-RT-R  | CTATGCACTAAGCCATGTGTGTTTG                          | qRT-PCR primer for JA pathway marker gene                                            |
| MYC2-F       | GAAGCGGATAGTAGTAGAGTT                              | qRT-PCR primer for JA pathway marker gene                                            |
| MYC2-R       | TTTCTCCCTCCTTTGTCT                                 | qRT-PCR primer for JA pathway marker gene                                            |
| PR1-RT-F     | TGAGATGTGGGTCGATGAGA                               | qRT-PCR primer for SA pathway marker gene                                            |
| PR1-RT-R     | CGAGTTACGCCAAACCACTT                               | qRT-PCR primer for SA pathway marker gene                                            |
| EIN2-RT-F    | TCACTCGGAAGAGGAAGC                                 | qRT-PCR primer for ET pathway marker gene                                            |
| EIN2-RT-R    | TGCGGACATTGAAGACAC                                 | qRT-PCR primer for ET pathway marker gene                                            |
| PET32a-AI6-F | GACAAGGCCATGGCTGATATCATGG<br>TCAGATCATTTCAGTTGCAGC | Expression in <i>E.coil</i> stain BL21                                               |
| PET32a-AI6-R | GGTGGTGGTGGTGGTGGTCTCGAGCTG<br>TTCCAACAGCTTTTTTA   | Expression in <i>E.coil</i> stain BL21                                               |
| CA-F1c       | GCCAGTTTGGCTGGACTA                                 | Primer for mutant construction                                                       |
| CA-R1b       | TAGTCCAGCCAAACTGGC                                 | Primer for mutant construction                                                       |
| WA-F3c       | GCTATCAAAGCGAATTCACC                               | Primer for mutant construction                                                       |
| WA-R3b       | GGTGAAATTCGCTTTGATAGC                              | Primer for mutant construction                                                       |

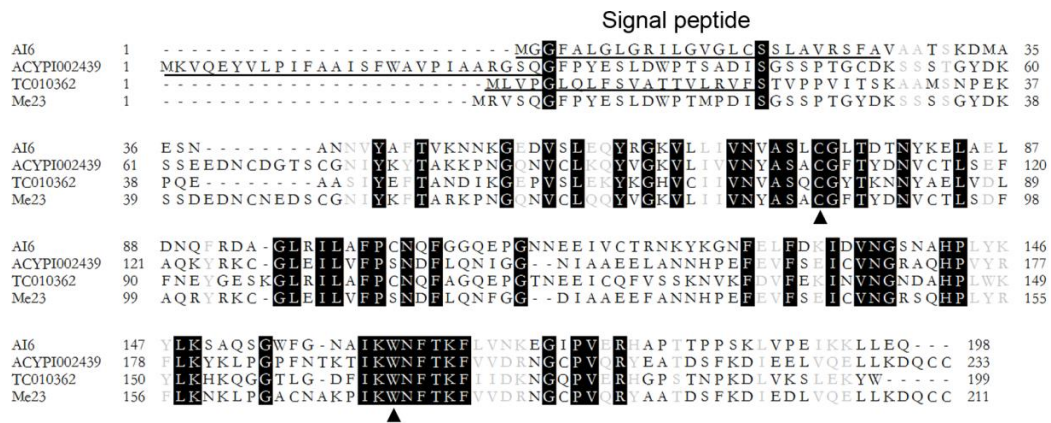

**Figure S1.** Multiple sequence alignment of GPx domain-containing proteins. The identical amino acids in the alignment are highlighted in black. The known functional amino acid residues engaged in the formation of the catalytic centre are marked with filled arrowheads.
